# Supplementary material
Source: PubMed Central journal article supplement (PMC9664094)
Supplement: tobaccocontrol-2022-057445supp001.pdf [file tobaccocontrol-2022-057445supp001.pdf]

Supplemental Table 1. Baseline cohort respondent characteristics

|                                      |                                | Dual users<br>n=200 |      | Exclusive<br>vapers<br>n=160 |       | Overall<br>N=360 |      |
|--------------------------------------|--------------------------------|---------------------|------|------------------------------|-------|------------------|------|
|                                      |                                | n                   | %    | n                            | %     | n                | %    |
| <b>Sex</b>                           | Male                           | 94                  | 47.0 | 72                           | 45.0  | 166              | 46.1 |
|                                      | Female                         | 106                 | 53.0 | 88                           | 55.0  | 194              | 53.9 |
| <b>Age group</b>                     | 18-24                          | 47                  | 23.5 | 9                            | 5.6   | 56               | 15.6 |
|                                      | 25-39                          | 45                  | 22.5 | 32                           | 20.0  | 77               | 21.4 |
|                                      | 40-54                          | 52                  | 26.0 | 41                           | 25.6  | 93               | 25.8 |
|                                      | 55 and up                      | 56                  | 28.0 | 78                           | 48.8  | 134              | 37.2 |
| <b>Income</b>                        | Low                            | 74                  | 37.0 | 46                           | 28.8  | 120              | 33.3 |
|                                      | Medium                         | 52                  | 26.0 | 44                           | 27.5  | 96               | 26.7 |
|                                      | High                           | 74                  | 37.0 | 70                           | 43.8  | 144              | 40.0 |
| <b>Education</b>                     | Low                            | 63                  | 31.5 | 44                           | 27.5  | 107              | 29.7 |
|                                      | Medium                         | 89                  | 44.5 | 79                           | 49.4  | 168              | 46.7 |
|                                      | High                           | 48                  | 24.0 | 37                           | 23.1  | 85               | 23.6 |
| <b>Smoking status</b>                | Daily smoker                   | 135                 | 67.5 | 0                            | 0.0   | 135              | 37.5 |
|                                      | Non-daily smoker               | 65                  | 32.5 | 0                            | 0.0   | 65               | 18.1 |
|                                      | Ex-smoker                      | 0                   | 0.0  | 160                          | 100.0 | 160              | 44.4 |
| <b>Vaping status, smoking status</b> | Daily vaper, daily smoker      | 65                  | 32.5 | 0                            | 0.0   | 65               | 18.1 |
|                                      | Daily vaper, non-daily smoker  | 35                  | 17.5 | 0                            | 0.0   | 35               | 9.7  |
|                                      | Daily vaper, ex-smoker         | 0                   | 0.0  | 148                          | 92.5  | 148              | 41.1 |
|                                      | Weekly vaper, daily smoker     | 70                  | 35.0 | 0                            | 0.0   | 70               | 19.4 |
|                                      | Weekly vaper, non-daily smoker | 30                  | 15.0 | 0                            | 0.0   | 30               | 8.3  |
|                                      | Weekly vaper, ex-smoker        | 0                   | 0.0  | 12                           | 7.5   | 12               | 3.3  |
| <b>Flavor/device use most often</b>  |                                |                     |      |                              |       |                  |      |
| <i>Cartridge</i>                     | Tobacco/unflavored             | 31                  | 15.5 | 15                           | 9.4   | 46               | 12.8 |
|                                      | Menthol/mint                   | 24                  | 12.0 | 9                            | 5.6   | 33               | 9.2  |
|                                      | Fruit/other                    | 22                  | 11.0 | 11                           | 6.9   | 33               | 9.2  |
| <i>Tank</i>                          | Tobacco/unflavored             | 23                  | 11.5 | 33                           | 20.6  | 56               | 15.6 |
|                                      | Menthol/mint                   | 20                  | 10.0 | 17                           | 10.6  | 37               | 10.3 |
|                                      | Fruit/other                    | 61                  | 30.5 | 71                           | 44.4  | 132              | 36.7 |
| <i>Disposable</i>                    | Tobacco/unflavored             | 6                   | 3.0  | 2                            | 1.3   | 8                | 2.2  |
|                                      | Non-tobacco flavors            | 13                  | 6.5  | 2                            | 1.3   | 15               | 4.2  |

Data are unweighted and unadjusted. Dual users: currently smoking and vaping. Exclusive vapers: ex-smokers who switched to ENDS.

**Supplemental Table 2.** Continued abstinence from smoking (versus relapse back to smoking) in 2020 among baseline frequent exclusive ENDS users who were ex-smokers in 2018 (n=160)

| 2018 ENDS flavor/device being used most often   | 2020 smoking status |                     |
|-------------------------------------------------|---------------------|---------------------|
|                                                 | Weighted % (n)      |                     |
|                                                 | Remained quit       | Returned to smoking |
| Tobacco/unflavored: all devices (n=50)          | 93.2 (47)           | 6.8 (3)             |
| Menthol/mint: all devices (n=27)                | 83.4 (24)           | 16.6 (3)            |
| Fruit and other flavors: disposable/tank (n=72) | 89.3 (64)           | 10.7 (8)            |
| Fruit and other flavors: cartridge* (n=11)      | 95.2 (10)           | 4.8 (1)             |
| Overall                                         | 90.2 (145)          | 9.8 (15)            |

Data are weighted and adjusted for sex, age group and time-in-sample. \*Flavor-device combination enforced under the 2020 federal policy.

**Supplemental Table 3.** Smoking status in 2020 among baseline (2018) dual users (smokers and frequent ENDS users)

| 2018 ENDS flavor/device used most often<br>by dual users | 2020 smoking status                    |                                                |                                 |                                                    |                                          |                         |
|----------------------------------------------------------|----------------------------------------|------------------------------------------------|---------------------------------|----------------------------------------------------|------------------------------------------|-------------------------|
|                                                          | Weighted % (n)                         |                                                |                                 |                                                    |                                          |                         |
| N=200                                                    | Remained<br>smoker &<br>frequent vaper | Remained<br>smoker &<br>reduced/quit<br>vaping | Overall<br>continued<br>smoking | Quit<br>smoking &<br>remained<br>frequent<br>vaper | Quit smoking<br>& reduced/quit<br>vaping | Overall quit<br>smoking |
| Tobacco/unflavored: all devices (n=60)                   | 61.8 (36)                              | 22.3 (14)                                      | <b>83.9</b> (50)                | 10.6 (5)                                           | 5.2 (5)                                  | <b>16.1</b> (10)        |
| Menthol/mint: all devices (n=50)                         | 51.5 (23)                              | 30.1 (18)                                      | <b>81.2</b> (41)                | 12.9 (4)                                           | 5.5 (5)                                  | <b>18.8</b> (9)         |
| Fruit and other flavors: disposable/tank (n=68)          | 37.1 (23)                              | 28.3 (21)                                      | <b>66.8</b> (44)                | 26.2 (16)                                          | 8.4 (8)                                  | <b>33.2</b> (24)        |
| Fruit and other flavors: cartridge* (n=22)               | 62.3 (10)                              | 12.1 (4)                                       | <b>78.4</b> (14)                | 4.9 (3)                                            | 20.7 (5)                                 | <b>21.6</b> (8)         |
| Overall (N=200)                                          | 52.2 (92)                              | 25.3 (57)                                      | <b>77.5</b> (149)               | 14.9 (28)                                          | 7.6 (23)                                 | <b>22.5</b> (53)        |

Data are weighted and adjusted for: sex, age, time-in-sample, and baseline smoking status (daily/non-daily).

Overall estimates deviate slightly from the two previous columns due to model parameter differences after combining the two groups.

\*Flavor-device combination enforced under the 2020 federal policy.
